# Supplementary material for: Effectiveness of Exercise Interventions on Pelvic Floor Muscle Function of Pregnant and Postpartum Women: A Systematic Review of Reviews
Source: Research Square preprint supplement (doi:10.21203/rs.3.rs-930063/v1), 2021-10-04
Supplement: Supplementary file 1 [file d90b26a7420a4ac26b9b3b7c.docx]

Online supplement 1. The original articles in the included reviews.

| meta-analysis  narrative analysis  Original studies (articles and abstracts) (n=147) | **Reviews (n=20)** | | | | | | | | | | | | | | | | | | | | |
| --- | --- | --- | --- | --- | --- | --- | --- | --- | --- | --- | --- | --- | --- | --- | --- | --- | --- | --- | --- | --- | --- |
| Almousa et al. 2018 | Boissonnault et al. 2012 | Colla et al. 2017 | Davenport et al. 2019a I | Davenport et al. 2019b K | Ferreira et al. 2012 | Gutke et al. 2015 | Harvey 2003 | Lemos et al. 2008 | Mørkved & Bo 2014 | Peng & Chou 2019 | Liddle & Pennick 2015 | Richards et al. 2012 | Shiri et al. 2017 | Stuge et al. 2003 | Tseng et al. 2015 | van Benten et al. 2014 | Wagg & Bunn 2007 | Woodley et al. 2020 | Wu et al. 2018 | The number of reviews where original study is |
| Agur et al. 2008 |  |  |  |  |  |  |  |  |  | x |  |  |  |  |  |  |  |  |  |  | 1 |
| Ahlund et al. 2013 |  |  |  |  |  |  |  |  |  |  |  |  |  |  |  |  |  |  | x |  | 1 |
| Akmese & Oran 2014 |  |  |  |  |  |  |  |  |  |  | x | x |  |  |  |  |  |  |  |  | 2 |
| Aliaga-Martinez et al. 2013 |  |  |  | x |  |  |  |  |  |  |  |  |  |  |  |  |  |  |  |  | 1 |
| Assis et al. 2015 |  |  |  |  |  |  |  |  |  |  |  |  |  |  |  |  |  |  | x |  | 1 |
| Backhausen et al. 2017 |  |  |  |  |  |  |  |  |  |  | x |  |  |  |  |  |  |  |  |  | 1 |
| Bandpei et al. 2010 |  |  |  |  |  |  |  |  |  |  |  | x |  |  |  |  |  |  |  |  | 1 |
| Barakat et al. 2011 |  |  |  | x |  |  |  |  |  |  |  |  |  |  |  |  |  |  | x |  | 2 |
| Bastiaenen et al. 2006 |  |  |  |  |  | x |  |  |  |  |  |  |  |  |  |  |  |  |  |  | 1 |
| Bastiaenen et al. 2008 |  |  |  |  |  | x |  |  |  |  |  |  |  |  |  |  |  |  |  |  | 1 |
| Beyaz et al. 2011 |  |  |  |  | x |  |  |  |  |  |  |  |  |  |  |  |  |  |  |  | 1 |
| Bø and Haakstad 2011 |  |  |  | x |  |  |  |  |  | x |  |  |  |  |  |  |  |  | x |  | 3 |
| Bø et al. 2015 |  |  |  |  |  |  |  |  |  |  |  |  |  |  |  |  |  |  |  | x | 1 |
| Chaudry et al. 2013 |  |  |  |  |  |  | x |  |  |  |  |  |  |  |  | x |  |  |  |  | 2 |
| Chavez et al. 2004 |  |  |  |  |  |  |  |  | x |  |  |  |  |  |  |  |  |  |  |  | 1 |
| Chiarelli & Cockburn 2002 |  |  |  |  |  |  |  | x |  | x |  |  |  |  |  |  |  | x | x |  | 4 |
| Chiarelli et al. 2004 |  |  |  |  |  |  |  |  |  | x |  |  |  |  |  |  |  | x | x | x | 4 |
| Citak et al. 2010 |  |  |  |  |  |  |  |  |  |  |  |  |  |  |  |  |  |  |  | x | 1 |
| Chu et al. 2012 |  |  |  |  |  |  |  |  |  |  |  |  |  |  |  |  |  |  |  | x | 1 |
| Cruz et al. 2014 |  |  |  |  |  |  |  |  |  |  |  |  |  |  |  |  |  |  | x |  | 1 |
| Depledge et al. 2005 |  | x | x |  |  |  |  |  |  |  |  | x | x |  |  |  | x |  |  |  | 5 |
| Dias et al. 2011 |  |  |  |  |  |  |  |  |  | x |  |  |  |  |  |  |  |  |  |  | 1 |
| Dinc et al. 2009 |  |  |  | x |  |  |  |  |  | x |  |  |  |  |  |  |  |  | x |  | 3 |
| Dokmeci et al. 2008 |  |  |  |  |  |  |  |  |  |  |  |  |  |  |  |  |  |  | x |  | 1 |
| Dougherty 1989 |  |  |  |  |  |  |  | x |  |  |  |  |  |  |  |  |  |  |  |  | 1 |
| Dufour et al. 2019 |  |  |  |  |  |  |  |  |  |  |  |  |  |  |  |  |  |  | x |  | 1 |
| Dumas et al. 1995 |  |  |  |  | x |  |  |  |  |  |  |  |  |  | x |  |  |  |  |  | 2 |
| Dumoulin et al. 2004 |  |  |  |  |  |  |  |  |  | x |  |  |  |  |  |  |  |  | x |  | 2 |
| Eggen et al. 2012 |  |  | x |  | x |  | x |  |  |  |  | x |  | x |  |  | x |  |  |  | 6 |
| Ekhdal & Petersson 2010 |  |  |  |  |  |  |  |  |  |  |  | x |  |  |  |  |  |  |  |  | 1 |
| Elden et al. 2008a |  |  |  |  |  |  | x |  |  |  |  | x |  |  |  |  |  |  |  |  | 2 |
| Elden et al. 2008b |  |  |  |  |  |  |  |  |  |  |  | x |  |  |  |  |  |  |  |  | 1 |
| Elden et al. 2005 | x | x |  |  |  |  | x |  |  |  | x | x |  |  |  |  |  |  |  |  | 5 |
| Elden et al. 2013 |  |  |  |  |  |  |  |  |  |  |  | x |  |  |  |  |  |  |  |  | 1 |
| Eliasson et al. 2005 |  |  |  | x |  |  |  |  |  |  |  |  |  |  |  |  |  |  |  |  | 1 |
| Elliott at al. 2009 |  |  |  |  |  |  |  |  |  | x |  |  |  |  |  |  |  |  | x |  | 2 |
| Ewings et al. 2005 |  |  |  |  |  |  |  |  |  | x |  |  |  |  |  |  |  |  | x |  | 2 |
| Field et al 2004 |  |  |  |  |  |  |  |  |  |  |  |  |  |  |  |  | x |  |  |  | 1 |
| Field et al. 1999 |  |  |  |  |  |  |  |  |  |  |  |  |  |  | x |  | x |  |  |  | 2 |
| Field et al. 2008 |  |  |  |  |  |  |  |  |  |  |  |  |  |  |  |  | x |  |  |  | 1 |
| Field et al. 2012 |  |  |  |  | x |  |  |  |  |  |  |  |  |  |  |  |  |  |  |  | 1 |
| Field et al. 2013 |  |  |  |  | x |  |  |  |  |  |  |  |  |  |  |  |  |  |  |  | 1 |
| Figueira et al. 2014 |  |  |  |  | x |  |  |  |  |  |  |  |  |  |  |  |  |  |  |  | 1 |
| Foxcroft et al. 2011 |  |  |  |  | x |  |  |  |  |  |  |  |  | x |  |  |  |  |  |  | 2 |
| Franchi et al. 1999 |  |  |  |  |  |  |  | x |  |  |  |  |  |  |  |  |  |  |  |  | 1 |
| Fritel et al. 2015 |  |  |  | x |  |  |  |  |  |  |  |  |  |  |  |  |  |  | x |  | 2 |
| Frost et al. 2014 |  |  |  |  |  |  |  |  |  |  |  |  |  |  |  |  |  |  | x |  | 1 |
| Frumenzio et al. 2012 |  |  |  |  |  |  |  |  |  |  |  |  |  |  |  |  |  |  | x |  | 1 |
| Garnæs et al. 2017 |  |  |  |  |  |  |  |  |  |  |  |  |  |  |  |  |  |  | x |  | 1 |
| Gaier et al. 2010 |  |  |  |  |  |  |  |  |  |  |  |  |  |  |  |  |  |  | x |  | 1 |
| Garshasbi & Faghih Zadeh 2005 |  | x |  |  | x |  | x |  |  |  |  | x |  | x |  |  | x |  |  |  | 6 |
| George et al. 2013 |  |  |  |  |  |  | x |  |  |  | x | x |  |  |  |  | x |  |  |  | 4 |
| Gil et al. 2011 |  |  | x |  |  |  |  |  |  |  |  | x |  |  |  |  |  |  |  |  | 2 |
| Glazener et al. 2001 |  |  |  |  |  |  |  | x |  | x |  |  |  |  |  |  |  | x | x | x | 5 |
| Glazener et al. 2005 |  |  |  |  |  |  |  |  |  | x |  |  |  |  |  |  |  | x | x |  | 3 |
| Golmakani et al. 2015 |  |  |  |  |  |  |  |  |  |  |  |  |  |  |  |  |  |  |  | x | 1 |
| Gorbea Chavez et al. 2004 |  |  |  | x |  |  |  |  |  | x |  |  |  |  |  |  |  |  | x |  | 3 |
| Granath et al. 2006 |  | x |  |  | x |  | x |  |  |  |  |  |  |  |  |  | x |  |  |  | 4 |
| Gundermann 2013 |  |  |  |  |  |  |  |  |  |  |  | x |  |  |  |  |  |  |  |  | 1 |
| Gupta 2014 |  |  |  |  | x |  |  |  |  |  |  |  |  |  |  |  |  |  |  |  | 1 |
| Gutke et al. 2010 |  |  |  |  |  | x | x |  |  |  |  |  |  |  |  | x |  |  |  |  | 3 |
| Haakstad et al. 2009 |  |  |  | x | x |  |  |  |  |  |  |  |  |  |  |  |  |  |  |  | 2 |
| Haakstad & Bø 2015 |  |  |  |  | x |  |  |  |  |  |  |  |  | x |  |  |  |  | x |  | 3 |
| Hendersen 1983 |  |  |  |  |  |  |  | x |  |  |  |  |  |  |  |  |  |  |  |  | 1 |
| Hensel 2014 |  |  |  |  |  |  |  |  |  |  |  | x |  |  |  |  |  |  |  |  | 1 |
| Hilde et al. 2013 |  |  |  |  |  |  |  |  |  |  |  |  |  |  |  |  |  |  | x | x | 2 |
| Hughes et al. 2001 |  |  |  |  |  |  |  | x |  | x |  |  |  |  |  |  |  |  | x |  | 3 |
| Hyakutake et al. 2018 |  |  |  |  |  |  |  |  |  |  |  |  |  |  |  |  |  |  | x |  | 1 |
| Johannessen et al. 2017 |  |  |  |  |  |  |  |  |  |  |  |  |  |  |  |  |  |  |  | x | 1 |
| Jonasson et al. 1989 |  |  |  |  |  |  |  | x |  |  |  |  |  |  |  |  |  |  |  |  | 1 |
| Jones 2000 |  |  |  |  |  |  |  | x |  |  |  |  |  |  |  |  |  |  |  |  | 1 |
| Kahyaoglu et al. 2016 |  |  |  | x |  |  |  |  |  |  |  |  |  |  |  |  |  |  | x |  | 2 |
| Kalus et al. 2008 |  |  |  |  |  |  |  |  |  |  |  | x | x |  |  |  | x |  |  |  | 3 |
| Kashanian et al. 2009 |  | x |  |  | x |  | x |  |  |  |  | x |  |  |  |  | x |  |  |  | 5 |
| Kaya & Yosunkaya 2013 |  |  |  |  |  |  |  |  |  |  |  | x |  |  |  |  |  |  |  |  | 1 |
| Keskin et al. 2012 |  |  |  |  |  |  | x |  |  |  | x | x |  |  |  |  |  |  |  |  | 3 |
| Kihlstrand et al. 1999 |  | x |  |  | x |  | x |  |  |  |  | x |  | x | x |  | x |  |  |  | 7 |
| Kim et al. 2012 |  |  |  |  |  |  |  |  |  | x |  |  |  |  |  |  |  |  | x |  | 2 |
| Kluge et al. 2011 |  |  |  |  | x |  | x |  |  |  |  | x |  |  |  |  | x |  |  |  | 4 |
| Ko et al. 2011 |  |  |  | x |  |  |  |  |  | x |  |  |  |  |  |  |  |  | x |  | 3 |
| Kocaoz et al. 2013 |  |  |  | x |  |  |  |  |  |  |  |  |  |  |  |  |  |  | x |  | 2 |
| Kokic et al. 2017 |  |  |  |  |  |  |  |  |  |  | x |  |  | x |  |  |  |  |  |  | 2 |
| Kolberg et al. 2016 |  |  |  |  |  |  |  |  |  |  |  |  |  |  |  |  |  |  |  | x | 1 |
| Kordi et al. 2013 | x |  |  |  | x |  | x |  |  |  | x | x |  |  |  |  | x |  |  |  | 6 |
| Kou et al. 2013 |  |  |  |  |  |  |  |  |  |  |  |  |  |  |  |  |  |  | x |  | 1 |
| Kvorning et al. 2004 |  |  |  |  |  |  |  |  |  |  |  | x |  |  |  |  |  |  |  |  | 1 |
| Ladefoged 2012 |  |  |  |  |  |  |  |  |  |  |  |  |  | x |  |  |  |  |  |  | 1 |
| Lekskulchai et al. 2014 |  |  |  | x |  |  |  |  |  |  |  |  |  |  |  |  |  |  |  |  | 1 |
| Li et al. 2016 |  |  |  |  |  |  |  |  |  |  |  |  |  |  |  |  |  |  |  | x | 1 |
| Licciardone et al. 2010 |  |  |  |  |  |  |  |  |  |  |  | x |  |  |  |  | x |  |  |  | 2 |
| Liu 2011 |  |  |  |  |  |  |  |  |  |  |  |  |  |  |  |  |  |  | x |  | 1 |
| Lund et al. 2006 |  |  |  |  |  |  |  |  |  |  |  | x |  |  |  |  |  |  |  |  | 1 |
| Mantle et al. 1981 |  |  |  |  |  |  |  |  |  |  |  |  |  |  | x |  |  |  |  |  | 1 |
| Martins & Pinto 2013 |  |  |  |  |  |  | x |  |  |  |  |  |  |  |  |  |  |  |  |  | 1 |
| Martins & Pinto 2014 |  |  |  |  |  |  |  |  |  |  | x | x |  |  |  |  |  |  |  |  | 2 |
| Martins & Silva 2014 |  |  | x |  |  |  |  |  |  |  |  |  |  |  |  |  |  |  |  |  | 1 |
| Martins et al. 2014 |  |  |  |  | x |  |  |  |  |  |  | x |  |  |  |  | x |  |  |  | 3 |
| Martins & Silva 2005 |  |  | x |  |  |  |  |  |  |  |  | x |  |  |  |  |  |  |  |  | 2 |
| Mason et al. 2010 |  |  |  | x |  |  |  |  |  | x |  |  |  |  |  |  |  |  |  |  | 2 |
| Mason et al. 2001 |  |  |  | x |  |  |  |  |  |  |  |  |  |  |  |  |  |  |  |  | 1 |
| Mens et al. 2000 | x |  |  |  |  | x | x |  |  |  |  |  |  |  | x | x |  |  |  |  | 5 |
| Meyer et al. 2001 |  |  |  |  |  |  |  |  |  | x |  |  |  |  |  |  |  |  | x |  | 2 |
| Miquelutti et al. 2013 |  |  |  | x | x |  |  |  |  |  | x | x |  | x |  |  |  |  | x |  | 6 |
| Mørkved & Bø 1997 |  |  |  |  |  |  |  |  |  | x |  |  |  |  |  |  |  |  |  |  | 1 |
| Mørkved & Bø 2000 |  |  |  |  |  |  |  |  |  | x |  |  |  |  |  |  |  |  |  |  | 1 |
| Mørkved et al. 2001 |  |  |  |  |  |  |  |  |  |  |  |  |  |  |  |  |  |  | x |  | 1 |
| Mørkved et al. 2003 |  |  |  |  |  |  |  | x | x | x |  |  |  |  |  |  |  |  | x |  | 4 |
| Mørkved et al. 2007 |  | x | x | x | x |  | x |  |  | x |  | x | x | x |  |  | x |  |  |  | 10 |
| Nielsen et al. 1988 |  |  |  |  |  |  |  | x |  |  |  |  |  |  |  |  |  |  |  |  | 1 |
| Nilsson-Wikmar et al. 1998 |  |  |  |  |  |  |  |  |  |  |  |  |  |  | x |  |  |  |  |  | 1 |
| Nilsson-Wikmar et al. 2005 | x | x | x |  | x |  | x |  |  |  |  |  |  |  |  |  | x |  |  |  | 6 |
| Noren et al. 1997 |  |  |  |  |  |  |  |  |  |  |  |  |  |  | x |  |  |  |  |  | 1 |
| Norton & Baker 1990 |  |  |  |  |  |  |  | x |  |  |  |  |  |  |  |  |  |  |  |  | 1 |
| Oakley et al. 2016 |  |  |  |  |  |  |  |  |  |  |  |  |  |  |  |  |  |  | x | x | 2 |
| Ostgaard et al. 1994 |  | x |  |  |  |  |  |  |  |  |  |  |  |  | x |  | x |  |  |  | 3 |
| Ozdemir et al. 2015 |  |  |  |  | x |  |  |  |  |  | x |  |  |  |  |  |  |  |  |  | 2 |
| Peirce et al. 2013 |  |  |  |  |  |  |  |  |  |  |  |  |  |  |  |  |  |  | x | x | 2 |
| Pelaez et al. 2014 |  |  |  | x |  |  |  |  |  |  |  |  |  |  |  |  |  |  | x |  | 2 |
| Peters & Van der Linde 2007 |  |  |  |  |  |  |  |  |  |  |  | x |  |  |  |  |  |  |  |  | 1 |
| Peterson et al. 2012 |  |  |  |  | x |  |  |  |  |  |  | x |  |  |  |  | x |  |  |  | 3 |
| Petrov Fieril et al. 2015 |  |  |  |  | x |  |  |  |  |  |  |  |  |  |  |  |  |  |  |  | 1 |
| Reilly et al. 2002 |  |  |  | x |  |  |  | x | x | x |  |  |  |  |  |  |  |  | x |  | 5 |
| Sacomori et al. 2019 |  |  |  |  |  |  |  |  |  |  |  |  |  |  |  |  |  |  | x |  | 1 |
| Sampselle et al. 1998 |  |  |  | x |  |  |  |  | x | x |  |  |  |  |  |  |  | x | x |  | 5 |
| Sangsawang & Serisathien 2012 |  |  |  | x |  |  |  |  |  | x |  |  |  |  |  |  |  |  |  |  | 2 |
| Sangsawang & Sangsawang 2016 |  |  |  | x |  |  |  |  |  |  |  |  |  |  |  |  |  |  | x |  | 2 |
| Sedaghati et al. 2007 |  |  |  |  | x |  |  |  |  |  |  | x |  |  |  |  | x |  |  |  | 3 |
| Shim et al. 2007 |  | x |  |  | x |  |  |  |  |  |  |  |  |  |  |  | x |  |  |  | 3 |
| Singh 2008 |  |  |  |  | x |  |  |  |  |  |  |  |  |  |  |  |  |  |  |  | 1 |
| Skelly et al. 2004 |  |  |  |  |  |  |  |  |  |  |  |  |  |  |  |  |  |  | x |  | 1 |
| Sleep & Grant 1987 |  |  |  |  |  |  |  |  |  | x |  |  |  |  |  |  |  | x | x |  | 3 |
| Stafne et al. 2012 |  |  | x | x | x |  | x |  |  | x | x | x |  | x |  |  | x |  | x |  | 10 |
| Stothers 2002 |  |  |  |  |  |  |  |  |  |  |  |  |  |  |  |  |  |  | x |  | 1 |
| Stuge et al. 2004a | x |  |  |  |  | x | x |  |  |  |  |  |  |  |  | x |  |  |  |  | 4 |
| Stuge et al. 2004b | x |  |  |  |  | x | x |  |  |  |  |  |  |  |  | x |  |  |  |  | 4 |
| Sun et al. 2015 |  |  |  |  |  |  |  |  |  |  |  |  |  |  |  |  |  |  |  | x | 1 |
| Suputtitada et al. 2002 |  | x |  |  | x |  | x |  |  |  | x | x |  | x |  |  |  |  |  |  | 6 |
| Szumilewicz et al. 2019 |  |  |  |  |  |  |  |  |  |  |  |  |  |  |  |  |  |  | x |  | 1 |
| Udayasankar 2002 |  |  |  |  |  |  |  | x |  |  |  |  |  |  |  |  |  |  | x |  | 2 |
| Wang 2009 |  |  |  |  |  |  |  |  |  |  |  | x |  |  |  |  |  |  |  |  | 1 |
| Wedenberg et al. 2000 |  |  |  |  |  |  | x |  |  |  |  | x | x |  | x |  |  |  |  |  | 4 |
| Wen et al. 2010 |  |  |  |  |  |  |  |  |  |  |  |  |  |  |  |  |  |  | x |  | 1 |
| Wilson & Herbison 1998 |  |  |  |  |  |  |  |  |  | x |  |  |  |  |  |  |  |  | x | x | 3 |
| Wilson et al. 1996 |  |  |  |  |  |  |  | x |  |  |  |  |  |  |  |  |  |  |  |  | 1 |
| Woldringh et al. 2007 |  |  |  | x |  |  |  |  |  | x |  |  |  |  |  |  |  |  | x |  | 3 |
| Yan et al. 2014 |  |  |  |  | x |  |  |  |  |  |  |  |  |  |  |  |  |  |  |  | 1 |
| Yang & Liu 2013 |  |  |  |  |  |  |  |  |  |  |  |  |  |  |  |  |  |  |  | x | 1 |
| Yang et al. 2017 |  |  |  |  |  |  |  |  |  |  |  |  |  |  |  |  |  |  | x | x | 2 |
| Zhang et al. 2015 |  |  |  |  |  |  |  |  |  |  |  |  |  |  |  |  |  |  |  | x | 1 |
| Zhu et al. 2012 |  |  |  | x |  |  |  |  |  |  |  |  |  |  |  |  |  |  |  |  | 1 |

References:

1. Agur WI, Steggles P, Waterfield M, et al. The long-term effectiveness of antenatal pelvic floor muscle training: eight-year follow up of a randomised controlled trial. BJOG 2008;115:985–90.
2. Ahlund S, Nordgren B, Wilander EL, Wiklund I, Friden C. Is home-based pelvic floor muscle training effective in treatment of urinary incontinence after birth in primiparous women? A randomized controlled trial. Acta Obstetricia et Gynecologica Scandinavica 2013;92(8): 909–15
3. Akmese ZB, Oran NT. Effects of progressive muscle relaxation exercises accompanied by music on low back pain and quality of life during pregnancy. J Midwifery Womens Health. 2014;59:503-509
4. Aliaga-Martinez F, Prats-Ribera E, Alsina-Hipolito M, et al. Impacto en la funcion de los musculos del suelo pelvico de un programa de entrenamiento especifico incluido en el control habitual del embarazo y el posparto: ensayo clinico controlado no aleatorizado. Matronas Prof 2013;14:36–44
5. Assis LC, Bernardes JM, Barbosa AM, Santini AC, Vianna LS, Dias A. Effectiveness of an illustrated home exercise guide on promoting urinary continence during pregnancy: a pragmatic randomized clinical trial [Portuguese]. Revista Brasileira de Ginecologia e Obstetricia 2015;37(10):460–6
6. Backhausen MG, Tabor A, Albert H, Rosthoj S, Damm P, Hegaard HK. The effects of an unsupervised water exercise program on low back pain and sick leave among healthy pregnant women e a randomised controlled trial. PloS One. 2017;12:e0182114.
7. Bandpei MAM, Ahmadshirvani M, Fakhri M, Rahmani N. The eGect of an exercise program and ergonomic advices on treatment of pregnancy-related low back pain: a randomized controlled clinical trial. Journal of Mazandaran University of Medical Sciences 2010;20(77):10-9
8. Barakat R, Pelaez M, Montejo R, Luaces M, Zakynthinaki M. Exercise during pregnancy improves maternal health perception: a randomized controlled trial. American Journal of Obstetrics and Gynecology 2011;204(5):402.e1–7.
9. Bastiaenen CH, Bie RA, Vlaeyen JW, Goossens, ME, Leffers P, Wolters PM, Bastiaanssen JM, Brandt PA, Essed GG 2008 Long-term effectiveness and costs of a brief self-management intervention in women with pregnancy-related low back pain after delivery. BMC Pregnancy Childbirth 8: 19
10. Bastiaenen CH, Bie RA, Wolters PM, Vlaeyen JW, Leffers P, Stelma F, Bastiaanssen JM, Essed GG, Brandt PA 2006 Effectiveness of a tailor-made intervention for pregnancy-related pelvic girdle and/or low back pain after delivery: Short-term results of a randomized clinical trial. BMC Musculoskeletal Disorders 7: 19
11. Beyaz EA, Ozcan E, Ketenci A, et al. The effectiveness of pregnancy rehabilitation: effects on low back pain and calf cramps during pregnancy and pregnancy outcome. Nobel Medicus 2011;7:67–74.
12. Bø K, Haakstad LA. Is pelvic floor muscle training effective when taught in a general fitness class in pregnancy? A randomised controlled trial. Physiotherapy 2011;97:190–5.
13. Bø K, Hilde G, Stær-Jensen J, et al. Postpartum pelvic floor muscle training and pelvic organ prolapsed—a randomized trial of primiparous women. Am J Obstet Gynecol 2015;212(1):38.e1–38.e7.
14. Chaudry S, Rashid F, Shah SIH. Effectiveness of core stabilisation exercises along with postural correction in postpartum back pain. Rawal Med J. 2013;38:256–9.
15. Chiarelli P. & Cockburn J. (2002) Promoting urinary continence in women after delivery; randomised controlled trial. British Medical Journal 324, 1241–1243.
16. Chiarelli P., Murphy B. & Cockburn J. (2004) Promoting urinary continence in postpartum women: 12 month follow-up data from a randomised controlled trial. International Urogynaecology Journal 15, 99–105.
17. Chu X, et al. The effect of biofeedback and electrical stimulation combined with pelvic floor muscle exercises for postpartum pelvic floor rehabilitation. Progress in Obstetrics and Gynecology 2012;21(9): 679–683.
18. Citak N, Cam C, Arslan H, et al. Postpartum sexual function of women and the effects of early pelvic floor muscle exercises. Acta Obstet Gynecol Scand 2010;89(6):817–822.
19. Cruz C, Riesco ML, Zanetti M. Supervised pelvic floor muscle training to treat urinary incontinence during pregnancy: a randomized controlled trial (Abstract number 403). Neurourology and Urodynamics 2014;33(6):867–8.
20. Depledge J, McNair PJ, Keal-Smith C, Williams M. Management of symphysis pubis dysfunction during pregnancy using exercise and pelvic support belts. Phys Ther. 2005;85:1290–1300.
21. Dias A, Assis L, Barbosa A, et al. Effectiveness of perineal exercises in controlling urinary incontinence and improving pelvic floor muscle function during pregnancy (abstract). Neurourol Urodyn 2011;30:968
22. Dinc A, Kizilkaya Beji N, Yalcin O. Effect of pelvic floor muscle exercises in the treatment of urinary incontinence during pregnancy and the postpartum period. Int Urogynecol J Pelvic Floor Dysfunct 2009;20:1223–31.
23. Dokmeci F, Bayramov S, Tur BS, Bayramov V, Seval M, Gok H. Pelvic floor muscle training during pregnancy: a randomized single-blind controlled study on improvement of antenatal and postpartum lower urinary tract symptoms (Abstract). Journal of Pelvic Medicine and Surgery 2008;14 (4):304.
24. Dougherty MC, Bishop KR,Abrams RM, Batich CD, Gimotty PAThe effect of exercise on the circumvaginal muscles in postpartum women. J Nurse Midwifery 1989;34(1):8-14.
25. Dufour S, Fedorkow D, Fang Q. The use of mobile health technology to support post-partum pelvic health: a randomized mixed methods pilot study (Abstract number 25). Neurourology and Urodynamics 2018;37(Suppl 5):S70-1.
26. Dumas GA, Reid JG, Wolfe LA, Griffin MP, McGrath MJ. Exercise, posture, and back pain during pregnancy. Part 2. Exercise and back pain. Clin Biomechanics 1995; 10: 104–9.
27. Dumoulin C, Lemieux MC, Bourbonnais D, et al. Physiotherapy for persistent postnatal stress urinary incontinence: a randomized controlled trial. Obstet Gynecol 2004;104:504–10.
28. Eggen MH, Stuge B, Mowinckel P, Jensen KS, Hagen KB. Can supervised group exercises including ergonomic advice reduce the prevalence and severity of low back pain and pelvic girdle pain in pregnancy? A randomized controlled trial. Phys Ther. 2012;92(6):781-90.
29. Ekdahl L, Petersson K. Acupuncture treatment of pregnant women with low back and pelvic pain – an intervention study. Scand J Caring Sci. 2010;24:175–82.
30. Elden H, Hagberg H, Olsen MF, Ladfors L, Ostgaard HC. Regression of pelvic girdle pain after delivery: follow-up of a randomised single blind controlled trial with different treatment modalities. Acta Obstet Gynecol Scand. 2008a;87:201–8.
31. Elden H, Ostgaard HC, Fagevik-Olsen M, Ladfors L, Hagberg H. Treatments of pelvic girdle pain in pregnant women: adverse eGects of standard treatment, acupuncture and stabilising exercises on the pregnancy, mother, delivery and the fetus/ neonate. BMC Complementary and Alternative Medicine 2008b;8:34-46.
32. Elden H, Ostgaard HC, Glantz A, Marciniak P, Linner AC, Olsen MF. Effects of craniosacral therapy as adjunct to standard treatment for pelvic girdle pain in pregnant women: a multicenter, single blind, randomized controlled trial. Acta Obstetricia et Gynecologica Scandinavica 2013;92(7):775-82.
33. Elden, H., Ladfors, L., Fagevik Olsen, M., Östgaard, H. C., & Hagberg, H. (2005). Effects of acupuncture and stabilizing exercises among women with pregnancy‐related pelvic pain: A randomised single blind controlled trial. BMJ, 330(7494), 761–766.
34. Eliasson K, Nordlander I, Larson B, et al. Influence of physical activity on urinary leakage in primiparous women. Scand J Med Sci Sports 2005;15:87–94.
35. Elliott V, Dumoulin C, Martin C, et al. Physical therapy for persistent postpartum stress urinary incontinence: A seven year follow-up study (abstract). Neurourol Urodyn 2009;28:820.
36. Ewings P, Spencer S, Marsh H, et al. Obstetric risk factors for urinary incontinence and preventative pelvic floor exercises: cohort study and nested randomized controlled trial. J Obstet Gynaecol 2005;25:558–64
37. Field T, Diego M, Delgado J, et al. Yoga and social support reduce prenatal depression, anxiety and cortisol. J Bodyw Mov Ther 2013;17:397–403.
38. Field T, Diego M, Hernandez-Reif M, et al. Yoga and massage therapy reduce prenatal depression and prematurity. J Bodyw Mov Ther 2012;16:204–9.
39. Field T, Diego MA, Hernandez-Reif M, Schanberg S, Kuhn C. Massage therapy effects on depressed pregnant women. J Psychosom Obstet Gynaecol. 2004;25:115-122.
40. Field T, Figueiredo B, Hernandez-Reif M, Diego M, Deeds O, Ascencio A. Massage therapy reduces pain in pregnant women, alleviates prenatal depression in both parents and improves their relationships. J Bodyw Mov Ther. 2008;12:146-150.
41. Field T, Hernandez-Reif M, Hart S, Theakston H, Schanberg S, Kuhn C. Pregnant women benefit from massage therapy. J Psychosom Obstet Gynecol 1999; 20: 31–8.
42. Figueira HA, Vale RGdeS, Rodrigues WFG, et al. Pregnancy-related low back pain relief after maximum static flexibility program. Health 2014;06:2966–72.
43. Foxcroft KF, Rowlands IJ, Byrne NM, et al. Exercise in obese pregnant women: the role of social factors, lifestyle and pregnancy symptoms. BMC Pregnancy Childbirth 2011;11:4.
44. Franchi M, Ciolli P, Greco E, Pisera A, Russo R. [The role of antepartum courses in preventing the onset of altered pelvic statics and urinary incontinence.] Minerva Ginecologica 1999;51 (4): 135-8. Italian.
45. Fritel X, de Tayrac R, Bader G, et al. Preventing urinary incontinence with supervised prenatal pelvic floor exercises: a randomized controlled trial. Obstet Gynecol 2015;126:370–7.
46. Frost A, Trankel D, Shannon M. The efficacy of written and verbal pelvic floor exercise discharge instructions in reducing urinary incontinence among postpartum patients (Abstract). Journal of Women’s Health Physical Therapy 2014; 38(1):40.
47. Frumenzio E, Giovannozzi S, Pietropaolo A, Salvini E, Bruno R, Lolli C, et al. Results of a prospective randomised study: role of pelvic-perineal rehabilitation in post-partum incontinence recovery (Abstract number 4). Neurourology and Urodynamics 2012;31(S1):S3.
48. Garnæs KK, Nyrnes SA, Salvesen KÅ, Salvesen Ø, Mørkved S, Moholdt T. EMect of supervised exercise training during pregnancy on neonatal and maternal outcomes among overweight and obese women. Secondary analyses of the ETIP trial: a randomised controlled trial. PLoS ONE 2017;12(3):e0173937
49. Gaier L, Lamberti G, Giraudo D. Pelvic floor muscle training during pregnancy to prevent urinary pelvic floor dysfunctions (Abstract). Neurourology and Urodynamics 2010;29(2S):64–5.
50. Garshasbi A, Faghih Zadeh S. The effect of exercise on the intensity of low back pain in pregnant women. Int J Gynecol Obstet. 2005;88:271–275.
51. George JW, Skaggs CD, Thompson PA, Nelson DM, Gavard JA, Gross GA. A randomized controlled trial comparing a multimodal intervention and standard obstetrics care for low back and pelvic pain in pregnancy. Am J Obstet Gynecol. 2013;208:295.e1-295.e7.
52. Gil VFB, Osis MJD, Faúndes A. Lombalgia durante a gestação: eficácia do tratamento com Reeducação Postural Global (RPG). Fisioter Pesqui. 2011;18(2):164-70.
53. Glazener C., Herbison G.P., Wilson P.D., MacArthur C., Lang G.D., Gee H. & Grant A.M. (2001) Conservative management of persistent postnatal urinary and faecal incontinence; randomised controlled trial. British Medical Journal 323, 593–596.
54. Glazener C., Herbison P., MacArthur C., Grant A. & Wilson P.D. (2005) Randomised controlled trial of conservative management of postnatal urinary and faecal incontinence: six year follow-up. British Medical Journal.
55. Golmakani N, Zare Z, Khadem N, et al. The effect of pelvic floor muscle exercises program on sexual self-efficacy in primiparous women after delivery. Iran J Nurs Midwifery Res 2015;20(3): 347–353.
56. Gorbea Chavez V, Velazquez Sanchez MdP. Efecto de los ejercicios del piso pelvico durante el embarazo y el puerperio en la prevencion de la incontinencia urinaria de esfuerzo (Effect of pelvic floor exercise during pregnancy and puerperium on prevention of urinary stress incontinence). Ginecol Obstet Mex 2004;72:628–36.
57. Granath AB, Hellgren MSE, Gunnarsson RK. Water aerobics reduces sick leave due to low back pain during pregnancy. JOGNN. 2006;35:465–471.
58. Gundermann S. Effectiveness of osteopathic treatment in pregnant women suGering from low back pain. A randomized controlled trial [Osteopathische Behandlung von Schwangeren mit Rückenschmerzen. Randomisierte kontrollierte Studie.[German]]. Unpublished D.O. Thesis.Akademie für Osteopathie.
59. Gupta SS. The efficacy of treatment program focusing on specific stabilizing exercises in antenatal period for treatment of pregnancy related to low back and pelvic girdle pain: a randomized controlled trial. Indian Journal of Physiotherapy and Occupational Therapy - An International Journal 2014;8:267–71.
60. Gutke A, Sjödahl J, Oberg B 2010 Specific muscle stabilizing as home exercises for persistent pelvic girdle pain after pregnancy: A randomized, controlled clinical trial. Journal of Rehabilitation Medicine 42: 929–935
61. Haakstad LA, Voldner N, Henriksen T, et al. Why do pregnant women stop exercising in the third trimester? Acta Obstet Gynecol Scand 2009;88:1267–75.
62. Haakstad LA, Bø K. Effect of a regular exercise programme on pelvic girdle and low back pain in previously inactive pregnant women: A randomized controlled trial. J Rehabil Med 2015;47:229–34
63. Hendersen JS. Effects of an antepartum teaching program on postpartum regeneration of the pubococcygeal muscle. J Obstet Gynecol Neonatal Nurs 1983; 12(6):403-8.
64. Hensel K. Osteopathic manipulative medicine in pregnancy: physiologic and clinical eGects. ClinicalTrials.gov (http:// clinicaltrials.gov/) (accessed 8 March 2012) 2008.
65. Hilde G, Stær-Jensen J, Siafarikas F, et al. Postpartum pelvic floor muscle training and urinary incontinence: a randomized controlled trial. Obstet Gynecol 2013;122(6):1231–1238.
66. Hughes P, Jackson S, Smith A, et al. Can antenatal pelvic floor exercises prevent postnatal incontinence? (abstract). Neurourol Urodyn 2001;20:447–8.
67. Hyakutake MT, Han V, Baerg L, Koenig NA, Cundi M GW, Lee T, et al. Pregnancy-associated pelvic floor health knowledge and reduction of symptoms: the PREPARED randomized controlled trial. Journal of Obstetrics and Gynaecology Canada 2018;40(4):418-25.
68. Johannessen H, Wibe A, Stordahl A, et al. Do pelvic floor muscle exercises reduce postpartum anal incontinence? A randomised controlled trial. BJOG 2017;124(4):686–694.
69. Jonasson A, Larsson B, Pschera H.Testing and training of the pelvic floor muscles after childbirth. Acta Obstet Gynecol Scand 1989;68:301-4
70. Jones MA. Pelvic floor exercises: a comparative study. Br J Midwifery 2000;8(8):492-8.
71. Kahyaoglu Sut H , Balkanli Kaplan P . Effect of pelvic floor muscle exercise on pelvic floor muscle activity and voiding functions during pregnancy and the postpartum period. Neurourol Urodyn 2016;35:417–22.
72. Kalus SM, Kornman L, Quinlivan JA. Managing back pain in pregnancy using a support garment: a randomised trial. BJOG: an international journal of obstetrics and gynaecology 2008;115:68-75.
73. Kashanian M, Akbari Z, Alizadeh MH. The effect of exercise on back pain and lordosis in pregnant women. Int J Gynecol Obstet. 2009;6(17):160–161
74. Kaya E, Yosunkaya N. The eGect of Kinesiotaping on low back pain during pregnancy. Turkiye Fiziksel Tip ve Rehabilitasyon Dergisi 2013;59(Suppl 1):248.
75. Keskin EA, Onur O, Keskin HL, Gumus II, Kafali H, Turhan N. Transcutaneous electrical nerve stimulation improves low back pain during pregnancy. Gynecol Obstet Invest. 2012;74:76-83
76. Kihlstrand M, Stenman B, Nilsson S, Axelsson O. Water-gymnastics reduced the intensity of back/low back pain in pregnant women. Acta Obstet Gynecol Scand. 1999;78:180–185
77. Kim EY, Kim SY, Oh DW. Pelvic floor muscle exercises utilizing trunk stabilization for treating postpartum urinary incontinence: randomized controlled pilot trial of supervised versus unsupervised training. Clin Rehabil 2012;26:132–41.
78. Kluge J, Hall D, Louw Q, Theron G, Grove D. Specific exercises to treat pregnancy-related low back pain in a South African population. Int J Gynaecol Obstet. 2011;113:187-191.
79. Ko PC, Liang CC, Chang SD, et al. A randomized controlled trial of antenatal pelvic floor exercises to prevent and treat urinary incontinence. Int Urogynecol J Pelvic Floor Dysfunct 2011;22:17–22.
80. Kocaoz S, Eroglu K, Sivaslioglu AA. Role of pelvic floor muscle exercises in the prevention of stress urinary incontinence during pregnancy and the postpartum period. Gynecologic and Obstetric Investigation 2013;75(1):34–40.
81. Kokic IS, Ivanisevic M, Uremovic M, Kokic T, Pisot R, Simunic B. Effect of therapeutic exercises on pregnancy-related low back pain and pelvic girdle pain: secondary analysis of a randomized controlled trial. J Rehabil Med. 2017;49:251-257.
82. Kolberg Tennfjord M, Hilde G, Staer-Jensen J, et al. Effect of postpartum pelvic floor muscle training on vaginal symptoms and sexual dysfunction-secondary analysis of a randomised trial. BJOG 2016;123(4): 634–42.
83. Kordi, R., Abolhasani, M., Rostami, M., Hantoushzadeh, S., Mansournia, M. A., & Vasheghani‐Farahani, F. (2013). Comparison between the effect of lumbopelvic belt and home based pelvic stabilizing exercise on pregnant women with pelvic girdle pain; a randomized controlled trial. Journal of Back and Musculoskeletal Rehabilitation, 26(2), 133–139.
84. Kou J-L, Dang L-J, Feng X-Q. Clinical study on the treatment of postpartum rehabilitation to improve the pelvic floor function. Medical Innovation of China 2013;10 (25):55–7.
85. Kvorning N, Holmberg C, Grennert L, Aberg A, Akeson J. Acupuncture relieves pelvic and low-back pain in late pregnancy. Acta Obstet Gynecol Scand. 2004;83:246–50.
86. Ladefoged, M.L., Bor, P., Svendlund, R., Sondergaard, N., Hojgaard, A. (2012). The effect of introducing regular exercise during pregnancy and postpartum in physically inactive women. Acta Obstet Gynecol Scand 91, 102.
87. Lekskulchai O , Wanichsetakul P . Effect of pelvic floor muscle training (PFMT) during pregnancy on bladder neck descend and delivery. J Med Assoc Thai 2014;97 Suppl 8:S156–63
88. Li Y, et al. Effect of postpartum pelvic floor muscle training on pelvic organ prolapse in primiparous women. Chinese Journal of Woman and Child Health Research 2016;27(11):1384–1387
89. Licciardone JC, Buchanan S, Hensel KL, King HH, Fulda KG, Stoll ST. Osteopathic manipulative treatment of back pain and related symptoms during pregnancy: a randomized controlled trial. Am J Obstet Gynecol. 2010;202:43.e1-43.e8.
90. Liu X-B. Pelvic floor muscle training for prevention and treatment of postpartum urinary incontinence clinical observation. Guide of China Medicine 2011;9(2):21–2
91. Lund I, Lundeberg T, Lonnberg L, Svensson E. Decrease of pregnant women’s pelvic pain after acupuncture: a randomized controlled single-blind study. Acta Obstet Gynecol Scand. 2006;85:12–9
92. Mantle MJ, Holmes J, Currey HL. Backache in pregnancy II. prophylactic influence of back care classes. Rheumatol Rehabil 1981; 20: 227–32.
93. Martins RF, Pinto e Silva JL. Treatment of pregnancy-related lumbar and pelvic girdle pain by the yoga method: a randomized controlled study. J Altern Complement Med 2014;20:24–31.
94. Martins RF, Pinto ES. Treatment of pregnancy-related lumbar and pelvic girdle pain by the yoga method: a randomized controlled study. J Altern Complement Med. 2014;20:24-31.
95. Martins RF, Silva JLP. Tratamento da lombalgia e dor pélvica posterior na gestação por um método de exercícios. Rev Bras Ginecol Obstet. 2005;27(5):275-82.
96. Martins RF, Silva JLP. Treatment of pregnancy-related lumbar and pelvic girdle pain by the yoga method: a randomized controlled study. J Altern Complement Med. 2014;20(1):24-31.
97. Mason L, Roe B, Wong H, et al. The role of antenatal pelvic floor muscle exercises in prevention of postpartum stress incontinence: a randomised controlled trial. J Clin Nurs 2010;19:2777–86.
98. Mason L, Glenn S,Walton I, Hughes C.The relationship between antenatal pelvic floor muscle exercises and postpartum stress incontinence. Physiotherapy 200 I ;87( 12):651.
99. Mens, J. M., Snijders, C. J., & Stam, H. J. (2000). Diagonal trunk muscle exercises in peripartum pelvic pain: A randomized clinical trial. Physical Therapy, 80, 1164–1173.
100. Meyer S, Hohlfeld P, Achtari C, et al. Pelvic floor education after vaginal delivery. Obstet Gynecol 2001;97(5 Pt 1):673–7.
101. Miquelutti MA, Cecatti JG, Makuch MY. Evaluation of a birth preparation program on lumbopelvic pain, urinary incontinence, anxiety and exercise: a randomized controlled trial. BMC Pregnancy Childbirth. 2013;13:154.
102. Mørkved S, Bø K. The effect of postpartum pelvic floor muscle exercise in the prevention and treatment of urinary incontinence. Int Urogynecol J Pelvic Floor Dysfunct 1997;8:217–22.
103. Mørkved S, Bø K. Effect of postpartum pelvic floor muscle training in prevention and treatment of urinary incontinence: a one-year follow up. BJOG 2000;107:1022–8.
104. Mørkved S, Smund Salvesen KA, Schei G, Lydersen S, Bo K. Does group training during pregnancy prevent lumbopelvic pain? A randomized clinical trial. Acta Obstetr et Gynecol. 2007;86:276–282
105. Mørkved S, Bø K,Schei B, Salvesen KA. Pelvic floor muscle training during pregnancy to prevent urinary incontinence: a single-blind randomized controlled trial. Obstet Gynecol 2003; 101 (2):313-19.
106. Nielsen CA, Sigsgaard I, Olsen M, Tolstrup M, Danneskiold-Samsoee B, Bock JE.Trainability of the pelvic floor: a prospective study during pregnancy and after delivery. Acta Obstet Gynecol Scand 1988;67:437-40.
107. Nilsson-Wikmar L, Holm K, Oijerstedt R, Harms-Ringdal K. et al. Tilscher H, Dorman T, Snijders CH, eds. Third Interdisciplinary World Congress on Low Back and Pelvic Pain. Vienna: 1998: 330–1.
108. Nilsson‐Wikmar, L., Holm, K., Oijerstedt, R., & Harms‐Ringdahl, K. (2005). Effect of three different physical therapy treatments on pain and activity in pregnant women with pelvic girdle pain: A randomized clinical trial with 3, 6, and 12 months follow‐up postpartum. Spine (Phila Pa 1976), 30, 850 PubMed–856.
109. Noren L, Ostgaard S, Nielsen TF, Ostgaard HC. Reduction of sick leave for lumbar back and posterior pelvic pain in pregnancy. Spine 1997; 22: 2157–60.
110. Norton P, Baker J. Randomised prospective trial of vaginal cones vs. Kegel exercises in postpartum primiparous women. Neurourol Urodyn 1990;9(4):434-5
111. Oakley SH, Ghodsi VC, Crisp CC, et al. Impact of pelvic floor physical therapy on quality of life and function after obstetric anal sphincter injury: a randomized controlled trial. Female Pelvic Med Reconstr Surg 2016; 22(4):205–213.
112. Ostgaard HC, Zetherstrom G, Roos-Hansson E, Svanberg B. Reduction of back and posterior pelvic pain in pregnancy. Spine. 1994;19:894–900.
113. Ozdemir S, Bebis H, Ortabag T, Acikel C. Evaluation of the efficacy of an exercise program for pregnant women with low back and pelvic pain: a prospective randomized controlled trial. J Adv Nurs. 2015;71:1926-1939.
114. Peirce C, Murphy C, Fitzpatrick M, et al. Randomised controlled trial comparing early home biofeedback physiotherapy with pelvic floor exercises for the treatment of third-degree tears (EBAPT Trial). BJOG 2013;120(10):1240–1247.
115. Pelaez M, Gonzalez-Cerron S, Montejo R, Barakat R. Pelvic floor muscle training included in a pregnancy exercise program is effective in primary prevention of urinary incontinence: a randomized controlled trial. Neurourology and Urodynamics 2014;33(1):67–71.
116. Peters R, van der Linde M. Osteopathic treatment of women with back pain during pregnancy. A randomised controlled trial [Osteopathische Behandlung von Frauen mit Rückenschmerzen während der SchwangerschaC. Eine randomisierte kontrollierte Studie]. Osteopathische Medizin 2007;8(1):26.
117. Peterson CD, Haas M, Gregory WT. A pilot randomized controlled trial comparing the efficacy of exercise, spinal manipulation, and neuro emotional technique for the treatment of pregnancy-related low back pain. Chiropr Man Therap. 2012;20:18.
118. Petrov Fieril K, Glantz A, Fagevik Olsen M. The efficacy of moderate-to-vigorous resistance exercise during pregnancy: a randomized controlled trial. Acta Obstet Gynecol Scand 2015;94:35–42
119. Reilly ET, Freeman RM, Waterfield MR, et al. Prevention of postpartum stress incontinence in primigravidae with increased bladder neck mobility: a randomised controlled trial of antenatal pelvic floor exercises. BJOG 2002;109:68–76
120. Sacomori C, Zomkowski K, dos Passos Porto I, Cardoso FL, Sperandio FF. Adherence and effectiveness of a single instruction of pelvic floor exercises: a randomized clinical trial. International Urogynecology Journal 2019 Jun 28.
121. Sampselle CM, Miller JM, Mims BL, et al. Effect of pelvic muscle exercise on transient incontinence during pregnancy and after birth. Obstet Gynecol 1998;91:406–12.
122. Sangsawang B, Sangsawang N. Is a 6-week supervised pelvic floor muscle exercise program effective in preventing stress urinary incontinence in late pregnancy in primigravid women?: a randomized controlled trial. European Journal of Obstetrics, Gynecology, and Reproductive Biology 2016;197: 103–10.
123. Sangsawang B, Serisathien Y. Effect of pelvic floor muscle exercise programme on stress urinary incontinence among pregnant women. J Adv Nurs 2012;68:1997–2007.
124. Sedaghati P, Ziaee V, Ardjmand A. The effect of an ergometric training program on pregnants weight gain and low back pain. Gazz Med Ital Arch Sci Med. 2007;166:209-213
125. Shim M, Leeb Y, Ohc H, Kim J. Effects of a back-pain-reducing program during pregnancy for Korean women: a non-equivalent control-group pretest–posttest study. Int J Nurs Stud. 2007;44:9–28.
126. Singh NO. Prevention and management of low backache inpregnant women through the use of exerciseprogram and education booklet. The Indian Journal of Occupational Therapy 2008;39:65–72.
127. Skelly J, Rush J, Eyles P, Burlock S, Morrow C, Fedorkow D. Postpartum urinary incontinence: regional prevalence and the impact of teaching pelvic muscle exercises to pregnant women with UI (Abstract number 552). 34th Annual Meeting of the International Continence Society and the International Urogynecology Association; 2004 Aug 23-27; Paris. 2004.
128. Sleep J. & Grant A. (1987) Pelvic floor exercises in postnatal care. Midwifery 3, 158–164
129. Stafne SN, Salvesen KÅ, Romundstad PR, Stuge B, Mørkved S. Does regular exercise during pregnancy influence lumbopelvic pain? A randomized controlled trial. Acta Obstet Gynecol Scand. 2012;91(5):552-9.
130. Stothers L. A randomized controlled trial to evaluate intrapartum pelvic floor exercise as a method of preventing urinary incontinence (Abstract). Journal of Urology 2002; 167(4 Suppl):106.
131. Stuge, B., Lærum, E., Kirkesola, G., & Vøllestad, N. (2004a). The efficacy of a treatment program focusing on specific stabilizing exercises for pelvic girdle pain after pregnancy. A randomized controlled trial. Spine, 29, 351–359.
132. Stuge, B., Veierød, M. B., Lærum, E., & Vøllestad, N. (2004b). The efficacy of a treatment program focusing on specific stabilizing exercises for pelvic girdle pain after pregnancy: A two‐year follow‐up of a randomized clinical trial. Spine, 29(10), E197–E203.
133. Sun Z, Zhu L, Lang J, et al. Postpartum pelvic floor rehabilitation on prevention of female pelvic floor dysfunction: a multicenter prospective randomized controlled study. Zhonghua Fu Chan Ke Za Zhi 2015;50(6): 420–427.
134. Suputtitada A, Wacharapreechanont T, Chaisayan P. Effect of “sitting pelvic tilt exercise” during the third trimester in primigravidas on back pain. J Med Assoc Thai. 2002;85(suppl 1):S170–S179.
135. Szumilewicz A, Dornowski M, Piernicka M, Worska A, Kuchta A, Kortas J, et al. High-low impact exercise program including pelvic floor muscle exercises improves pelvic floor muscle function in healthy pregnant women: a randomized control trial. Frontiers in Physiology 2019;9:1867.
136. Udayasankar V,Steggies P,Freeman RM,Waterfield MR, Adekanmi 0, Reilly ET. Prevention of stress incontinence by antepartum pelvic floor exercises (PFE) in primigravidae with bladder neck mobility: a four-year follow-up. Proceedings of the 27th Annual Meeting of the International Urogynecological Association, Prague (Czech Republic) 21-24 August 2002. lnt Urogynecol J 2002; 13 Suppl 1:557
137. Wang SM, Dezinno P, Lin EC, Lin H, Yue JJ, Berman MR, et al. Auricular acupuncture as a treatment for pregnant women who have low back and posterior pelvic pain: a pilot study. Am J Obstet Gynecol. 2009;201:e1–9.
138. Wedenberg K, Moen B, Norling A. A prospective randomized study comparing acupuncture with physiotherapy for low-back and pelvic pain in pregnancy. Acta Obstet Gynecol Scand. 2000;79:331–5.
139. Wen X-H, Shi S-Q, Wang J-Y. Pelvic muscles exercise for postpartum stress urinary incontinence. China Practical Medicine 2010;5(15):72–3
140. Wilson PD, Herbison GP. A randomized controlled trial of pelvic floor muscle exercises to treat postnatal urinary incontinence. Int Urogynecol J Pelvic Floor Dysfunct 1998;9(5):257–264.
141. Wilson PD, Herbison RM, Herbison JP. Obstetric practice and the prevalence of urinary incontinence three months after delivery. Br J Obstet Gynaecol 1996; I 03: 154-61
142. Woldringh C, van den Wijngaart M, Albers-Heitner P, et al. Pelvic floor muscle training is not effective in women with UI in pregnancy: a randomised controlled trial. Int Urogynecol J Pelvic Floor Dysfunct 2007;18:383–90
143. Yan CF, Hung YC, Gau ML, et al. Effects of a stability ball exercise programme on low back pain and daily life interference during pregnancy. Midwifery 2014;30:412–9.
144. Yang S, Sang W, Feng J, et al. The effect of rehabilitation exercises combined with direct vagina low voltage low frequency electric stimulation on pelvic nerve electrophysiology and tissue function in primiparous women: a randomised controlled trial. J Clin Nurs 2017.
145. Yang X, Liu Y. Analysis of the effect of pelvic floor muscle training in postpartum pelvic floor dysfunction. Journal of International Obstetrics and Gynecology 2013;40(2):164–166. 43.
146. Zhang R, et al. Effect on pelvic floor muscle function and quality of life by pelvic floor muscle exercise combined with lifestyle intervention in postpartum women. Chinese Journal of Health Care and Medicine 2015; 17(6):469–472
147. Zhu L, Li L, Lang JH, et al. Prevalence and risk factors for peri- and postpartum urinary incontinence in primiparous women in China: a prospective longitudinal study. Int Urogynecol J 2012;23:563–72.
